# Supplementary material
Source: publisher figshare collection journal article supplement (https://acs.figshare.com/ndownloader/files/6025479)
Supplement: Supplementary file 1 [file 6025479]

## ***Supporting Information***

### **Partial Ion-Exchange Derived 2D Cu-Zn-In-S Nanosheets as Sensitizers of 1D TiO<sub>2</sub> Nanorods for Boosting Solar Water Splitting**

Qiong Liu<sup>†</sup>, Fengren Cao<sup>†</sup>, Fangli Wu<sup>†</sup>, Shimou Chen<sup>II</sup>, Jie Xiong,<sup>\*,‡</sup> and Liang Li<sup>\*,†</sup>

<sup>†</sup>College of Physics, Optoelectronics and Energy, Collaborative Innovation Center of Suzhou Nano Science and Technology, Jiangsu Key Laboratory of Thin Films, Center for Energy Conversion Materials & Physics (CECMP), Soochow University, Suzhou, 215006, P. R. China

<sup>‡</sup>State Key Laboratory of Electronic Thin Films and Integrated Devices, University of Electronic Science and Technology of China, Chengdu 610054, P. R. China

<sup>II</sup>Key Laboratory of Green Process and Engineering, State Key Laboratory of Multiphase Complex Systems, Institute of Process Engineering, Chinese Academy of Sciences, Beijing 100190, P. R. China

---

\*Corresponding author at: College of Physics, Optoelectronics and Energy, Soochow University, Suzhou 215006, P. R. China; University of Electronic Science and Technology of China, Chengdu 610054, P. R. China

*Email addresses:* lli@suda.edu.cn (L. Li), jiexiong@uestc.edu.cn (J. Xiong)

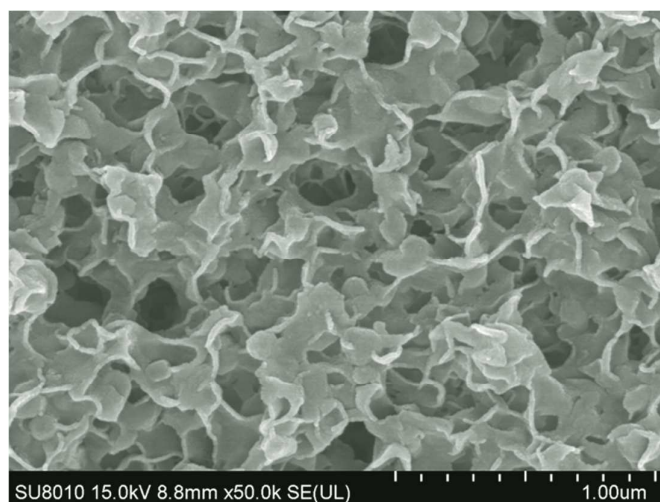

**Figure S1.** SEM of the top surface view of Cu(10s)/TiO<sub>2</sub>.

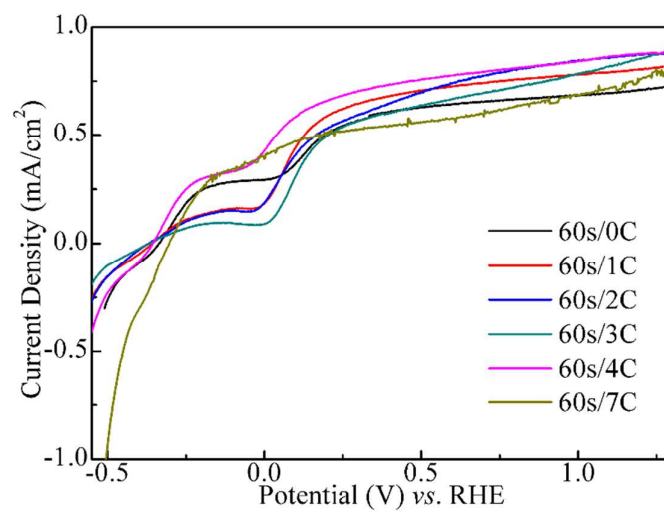

**Figure S2.** *J-V* curves of Cu(60s)/TiO<sub>2</sub> (0 C) and ZnS-coated Cu(60s)/TiO<sub>2</sub> with different ZnS capping cycles (1 C, 2C, 3C, 4C, 7 C) under one-sun illumination.

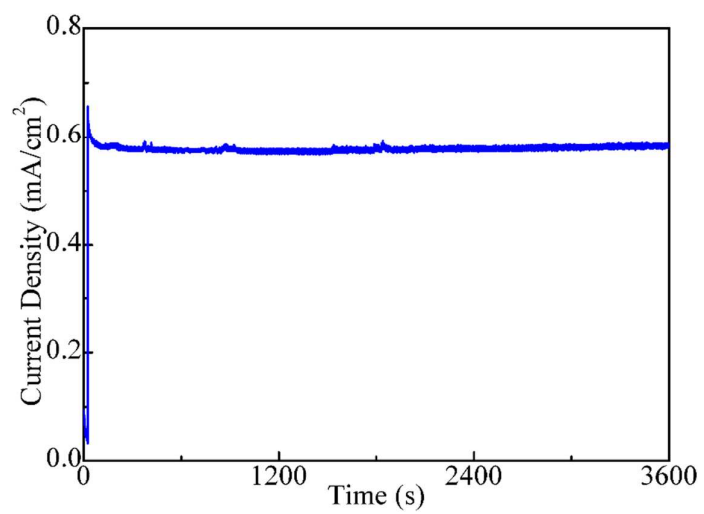

**Figure S3.** Photocurrent stability for the TiO<sub>2</sub>/ZnIn<sub>2</sub>S<sub>4</sub> electrode.

| Table | Samples                                            | $J$ (mA/cm <sup>2</sup> ) @ 0.8 V | $V_{on}$ (V) | S1. |
|-------|----------------------------------------------------|-----------------------------------|--------------|-----|
|       | TiO <sub>2</sub>                                   | 0.34                              | 0.03         |     |
|       | ZnIn <sub>2</sub> S <sub>4</sub> /TiO <sub>2</sub> | 0.65                              | -0.53        |     |
|       | Cu(60s)/TiO <sub>2</sub>                           | 0.67                              | -0.34        |     |
|       | ZnS(4C)/Cu(60s)/TiO <sub>2</sub>                   | 0.81                              | -0.32        |     |

Summary of parameters for the different photoanodes.

**Table S2.** EDS results before and after photocurrent stability measurements for the ZnS(4C)/Cu(60s)/TiO<sub>2</sub> sample.

| <b>60 s</b> | <b>Cu (%)</b> | <b>Zn (%)</b> | <b>In (%)</b> | <b>S (%)</b> |
|-------------|---------------|---------------|---------------|--------------|
| Before      | 34.6          | 5.2           | 10.8          | 49.4         |
| After       | 32.9          | 5.7           | 12.6          | 48.9         |
